# Supplementary material
Source: publisher figshare collection journal article supplement (https://acs.figshare.com/ndownloader/files/3921958)
Supplement: Supplementary file 1 [file 3921958]

  
data_r131224c 
  
_audit_creation_method            SHELXL-97 
_chemical_name_systematic 
; 
 ? 
; 
_chemical_name_common             ? 
_chemical_melting_point           ? 
_chemical_formula_moiety          ? 
_chemical_formula_sum 
 'C18 H15 F3 N2 O2 S' 
_chemical_formula_weight          380.38 
  
loop_ 
 _atom_type_symbol 
 _atom_type_description 
 _atom_type_scat_dispersion_real 
 _atom_type_scat_dispersion_imag 
 _atom_type_scat_source 
 'C'  'C'   0.0033   0.0016 
 'International Tables Vol C Tables 4.2.6.8 and 6.1.1.4' 
 'H'  'H'   0.0000   0.0000 
 'International Tables Vol C Tables 4.2.6.8 and 6.1.1.4' 
 'N'  'N'   0.0061   0.0033 
 'International Tables Vol C Tables 4.2.6.8 and 6.1.1.4' 
 'O'  'O'   0.0106   0.0060 
 'International Tables Vol C Tables 4.2.6.8 and 6.1.1.4' 
 'F'  'F'   0.0171   0.0103 
 'International Tables Vol C Tables 4.2.6.8 and 6.1.1.4' 
 'S'  'S'   0.1246   0.1234 
 'International Tables Vol C Tables 4.2.6.8 and 6.1.1.4' 
  
_symmetry_cell_setting            Monoclinic 
_symmetry_space_group_name_H-M    P2(1)/n 
  
loop_ 
 _symmetry_equiv_pos_as_xyz 
 'x, y, z' 
 '-x+1/2, y+1/2, -z+1/2' 
 '-x, -y, -z' 
 'x-1/2, -y-1/2, z-1/2' 
  
_cell_length_a                    12.393(3) 
_cell_length_b                    10.745(2) 
_cell_length_c                    13.090(3) 
_cell_angle_alpha                 90.00 
_cell_angle_beta                  100.07(3) 
_cell_angle_gamma                 90.00 
_cell_volume                      1716.3(6) 
_cell_formula_units_Z             4 
_cell_measurement_temperature     173(2) 
_cell_measurement_reflns_used     5097 
_cell_measurement_theta_min       2.0881 
_cell_measurement_theta_max       27.8426 
  
_exptl_crystal_description        ? 
_exptl_crystal_colour             ? 
_exptl_crystal_size_max           0.20 
_exptl_crystal_size_mid           0.18 
_exptl_crystal_size_min           0.12 
_exptl_crystal_density_meas       ? 
_exptl_crystal_density_diffrn     1.472 
_exptl_crystal_density_method     'not measured' 
_exptl_crystal_F_000              784 
_exptl_absorpt_coefficient_mu     0.235 
_exptl_absorpt_correction_type    MULTI-SCAN 
_exptl_absorpt_correction_T_min   0.9546 
_exptl_absorpt_correction_T_max   0.9724 
_exptl_absorpt_process_details    crystalclear 
  
_exptl_special_details 
; 
 ? 
; 
  
_diffrn_ambient_temperature       173(2) 
_diffrn_radiation_wavelength      0.71073 
_diffrn_radiation_type            MoK\a 
_diffrn_radiation_source          'rotating anode' 
_diffrn_radiation_monochromator   confocal 
_diffrn_measurement_device_type   'rigaku saturn' 
_diffrn_measurement_method        '\w scans' 
_diffrn_detector_area_resol_mean  ? 
_diffrn_standards_number          0 
_diffrn_standards_interval_count  0 
_diffrn_standards_interval_time   0 
_diffrn_standards_decay_%         0 
_diffrn_reflns_number             17157 
_diffrn_reflns_av_R_equivalents   0.0422 
_diffrn_reflns_av_sigmaI/netI     0.0409 
_diffrn_reflns_limit_h_min        -16 
_diffrn_reflns_limit_h_max        13 
_diffrn_reflns_limit_k_min        -14 
_diffrn_reflns_limit_k_max        14 
_diffrn_reflns_limit_l_min        -17 
_diffrn_reflns_limit_l_max        17 
_diffrn_reflns_theta_min          2.09 
_diffrn_reflns_theta_max          27.92 
_reflns_number_total              4101 
_reflns_number_gt                 3138 
_reflns_threshold_expression      >2sigma(I) 
  
_computing_data_collection        'crystalclear' 
_computing_cell_refinement        'crystalclear' 
_computing_data_reduction         'crystalclear' 
_computing_structure_solution     'SHELXS-97 (Sheldrick, 1990)' 
_computing_structure_refinement   'SHELXL-97 (Sheldrick, 1997)' 
_computing_molecular_graphics     'Bruker SHELXTL' 
_computing_publication_material   'Bruker SHELXTL' 
  
_refine_special_details 
; 
 Refinement of F^2^ against ALL reflections.  The weighted R-factor wR and 
 goodness of fit S are based on F^2^, conventional R-factors R are based 
 on F, with F set to zero for negative F^2^. The threshold expression of 
 F^2^ > 2sigma(F^2^) is used only for calculating R-factors(gt) etc. and is 
 not relevant to the choice of reflections for refinement.  R-factors based 
 on F^2^ are statistically about twice as large as those based on F, and R- 
 factors based on ALL data will be even larger. 
; 
  
_refine_ls_structure_factor_coef  Fsqd 
_refine_ls_matrix_type            full 
_refine_ls_weighting_scheme       calc 
_refine_ls_weighting_details 
 'calc w=1/[\s^2^(Fo^2^)+(0.0736P)^2^+0.0000P] where P=(Fo^2^+2Fc^2^)/3' 
_atom_sites_solution_primary      direct 
_atom_sites_solution_secondary    difmap 
_atom_sites_solution_hydrogens    geom 
_refine_ls_hydrogen_treatment     mixed 
_refine_ls_extinction_method      SHELXL 
_refine_ls_extinction_coef        0.035(4) 
_refine_ls_extinction_expression 
 'Fc^*^=kFc[1+0.001xFc^2^\l^3^/sin(2\q)]^-1/4^' 
_refine_ls_number_reflns          4101 
_refine_ls_number_parameters      269 
_refine_ls_number_restraints      73 
_refine_ls_R_factor_all           0.0531 
_refine_ls_R_factor_gt            0.0408 
_refine_ls_wR_factor_ref          0.1176 
_refine_ls_wR_factor_gt           0.1101 
_refine_ls_goodness_of_fit_ref    1.071 
_refine_ls_restrained_S_all       1.180 
_refine_ls_shift/su_max           0.004 
_refine_ls_shift/su_mean          0.000 
  
loop_ 
 _atom_site_label 
 _atom_site_type_symbol 
 _atom_site_fract_x 
 _atom_site_fract_y 
 _atom_site_fract_z 
 _atom_site_U_iso_or_equiv 
 _atom_site_adp_type 
 _atom_site_occupancy 
 _atom_site_symmetry_multiplicity 
 _atom_site_calc_flag 
 _atom_site_refinement_flags 
 _atom_site_disorder_assembly 
 _atom_site_disorder_group 
S1 S 0.41931(3) 0.52469(4) 0.13784(3) 0.01961(15) Uani 1 1 d . . . 
O1 O 0.53111(9) 0.51004(11) 0.12508(10) 0.0245(3) Uani 1 1 d . . . 
O2 O 0.38888(10) 0.49671(11) 0.23584(9) 0.0261(3) Uani 1 1 d . . . 
N1 N 0.21471(12) 0.56269(16) -0.12237(12) 0.0325(4) Uani 1 1 d . . . 
N2 N 0.34720(11) 0.43674(13) 0.05174(11) 0.0218(3) Uani 1 1 d D . . 
C1 C 0.22994(13) 0.41339(15) 0.05476(14) 0.0251(4) Uani 1 1 d . . . 
H1A H 0.2243 0.3747 0.1222 0.030 Uiso 1 1 calc R . . 
H1B H 0.2015 0.3527 -0.0003 0.030 Uiso 1 1 calc R . . 
C2 C 0.15788(13) 0.52745(15) 0.04064(14) 0.0231(4) Uani 1 1 d . . . 
C3 C 0.15492(13) 0.60167(17) -0.05000(14) 0.0264(4) Uani 1 1 d . . . 
C4 C 0.21504(17) 0.6346(2) -0.20387(16) 0.0446(5) Uani 1 1 d . . . 
H4 H 0.2566 0.6083 -0.2544 0.054 Uiso 1 1 calc R . . 
C5 C 0.15782(18) 0.7474(2) -0.22059(18) 0.0494(6) Uani 1 1 d . . . 
H5 H 0.1615 0.7959 -0.2805 0.059 Uiso 1 1 calc R . . 
C6 C 0.09692(16) 0.7862(2) -0.14957(18) 0.0444(6) Uani 1 1 d . . . 
H6 H 0.0570 0.8620 -0.1601 0.053 Uiso 1 1 calc R . . 
C7 C 0.09311(14) 0.71369(17) -0.06009(15) 0.0319(4) Uani 1 1 d . . . 
C8 C 0.03391(14) 0.74676(18) 0.01854(17) 0.0348(5) Uani 1 1 d . . . 
H8 H -0.0072 0.8218 0.0118 0.042 Uiso 1 1 calc R . . 
C9 C 0.03406(14) 0.67423(18) 0.10381(16) 0.0316(4) Uani 1 1 d . . . 
C10 C 0.09778(14) 0.56343(17) 0.11334(15) 0.0279(4) Uani 1 1 d . . . 
H10 H 0.0985 0.5125 0.1728 0.033 Uiso 1 1 calc R . . 
C11 C -0.02813(16) 0.7086(2) 0.18888(19) 0.0463(6) Uani 1 1 d . . . 
H11A H -0.0660 0.7880 0.1720 0.069 Uiso 1 1 calc R . . 
H11B H 0.0231 0.7165 0.2546 0.069 Uiso 1 1 calc R . . 
H11C H -0.0820 0.6436 0.1953 0.069 Uiso 1 1 calc R . . 
C12 C 0.38389(12) 0.68200(14) 0.10803(13) 0.0196(3) Uani 1 1 d . . . 
C13 C 0.32015(13) 0.74617(16) 0.16794(13) 0.0235(4) Uani 1 1 d . . . 
H13 H 0.2983 0.7075 0.2264 0.028 Uiso 1 1 calc R . . 
C14 C 0.28888(14) 0.86720(16) 0.14132(14) 0.0262(4) Uani 1 1 d . . . 
H14 H 0.2447 0.9120 0.1811 0.031 Uiso 1 1 calc R . . 
C15 C 0.32202(14) 0.92286(15) 0.05660(14) 0.0258(4) Uani 1 1 d . A . 
C16 C 0.38599(15) 0.85882(17) -0.00270(15) 0.0297(4) Uani 1 1 d . . . 
H16 H 0.4084 0.8980 -0.0606 0.036 Uiso 1 1 calc R . . 
C17 C 0.41720(14) 0.73720(16) 0.02286(14) 0.0270(4) Uani 1 1 d . . . 
H17 H 0.4608 0.6923 -0.0174 0.032 Uiso 1 1 calc R . . 
C18 C 0.28611(17) 1.05280(18) 0.02916(17) 0.0380(5) Uani 1 1 d D . . 
F1 F 0.3184(11) 1.1016(10) -0.0482(7) 0.071(3) Uani 0.346(12) 1 d PDU A 1 
F2 F 0.1833(6) 1.0677(9) 0.0204(14) 0.089(3) Uani 0.346(12) 1 d PDU A 1 
F3 F 0.3340(12) 1.1294(6) 0.1049(8) 0.087(3) Uani 0.346(12) 1 d PDU A 1 
F1' F 0.3522(4) 1.1122(5) -0.0230(5) 0.0746(17) Uani 0.654(12) 1 d PDU A 2 
F2' F 0.1903(4) 1.0547(4) -0.0399(5) 0.0767(15) Uani 0.654(12) 1 d PDU A 2 
F3' F 0.2674(8) 1.1204(4) 0.1060(4) 0.0870(18) Uani 0.654(12) 1 d PDU A 2 
H2 H 0.3583(17) 0.453(2) -0.0124(10) 0.043(6) Uiso 1 1 d D . . 
  
loop_ 
 _atom_site_aniso_label 
 _atom_site_aniso_U_11 
 _atom_site_aniso_U_22 
 _atom_site_aniso_U_33 
 _atom_site_aniso_U_23 
 _atom_site_aniso_U_13 
 _atom_site_aniso_U_12 
S1 0.0191(2) 0.0176(2) 0.0224(2) 0.00050(15) 0.00444(16) 0.00189(15) 
O1 0.0168(6) 0.0269(6) 0.0300(7) -0.0004(5) 0.0049(5) 0.0038(5) 
O2 0.0293(7) 0.0275(7) 0.0229(6) 0.0036(5) 0.0084(5) -0.0007(5) 
N1 0.0290(8) 0.0398(9) 0.0278(8) 0.0028(7) 0.0026(6) 0.0017(7) 
N2 0.0213(7) 0.0186(7) 0.0256(8) -0.0019(6) 0.0043(6) 0.0012(5) 
C1 0.0202(8) 0.0201(8) 0.0346(10) 0.0008(7) 0.0035(7) -0.0019(6) 
C2 0.0154(8) 0.0216(8) 0.0314(9) -0.0006(7) 0.0015(7) -0.0023(6) 
C3 0.0183(8) 0.0275(9) 0.0313(9) 0.0006(7) -0.0011(7) 0.0002(7) 
C4 0.0440(12) 0.0587(14) 0.0300(11) 0.0075(10) 0.0033(9) 0.0022(10) 
C5 0.0496(13) 0.0593(15) 0.0364(12) 0.0199(11) -0.0007(10) 0.0073(11) 
C6 0.0377(12) 0.0411(12) 0.0481(13) 0.0148(10) -0.0096(10) 0.0069(9) 
C7 0.0219(9) 0.0314(10) 0.0389(11) 0.0038(8) -0.0043(8) 0.0020(7) 
C8 0.0194(9) 0.0292(10) 0.0534(13) -0.0004(9) -0.0005(8) 0.0066(7) 
C9 0.0177(8) 0.0319(10) 0.0451(11) -0.0093(8) 0.0052(8) -0.0016(7) 
C10 0.0213(9) 0.0282(9) 0.0338(10) -0.0010(8) 0.0038(7) -0.0048(7) 
C11 0.0357(11) 0.0465(13) 0.0592(15) -0.0140(11) 0.0151(11) 0.0033(9) 
C12 0.0190(8) 0.0159(7) 0.0239(8) -0.0019(6) 0.0041(6) 0.0002(6) 
C13 0.0245(9) 0.0230(8) 0.0241(8) -0.0018(7) 0.0071(7) 0.0010(7) 
C14 0.0260(9) 0.0240(9) 0.0298(9) -0.0052(7) 0.0084(7) 0.0040(7) 
C15 0.0268(9) 0.0189(8) 0.0315(9) -0.0013(7) 0.0039(7) 0.0031(7) 
C16 0.0372(10) 0.0231(9) 0.0323(9) 0.0058(7) 0.0159(8) 0.0038(7) 
C17 0.0302(9) 0.0228(9) 0.0314(9) 0.0002(7) 0.0150(8) 0.0043(7) 
C18 0.0442(13) 0.0266(10) 0.0455(12) 0.0048(9) 0.0140(10) 0.0107(8) 
F1 0.123(7) 0.053(4) 0.045(3) 0.031(3) 0.042(4) 0.052(5) 
F2 0.048(3) 0.068(4) 0.157(8) 0.046(5) 0.033(4) 0.040(3) 
F3 0.147(7) 0.019(2) 0.076(4) -0.016(2) -0.035(4) 0.019(4) 
F1' 0.058(2) 0.0344(15) 0.139(5) 0.039(2) 0.036(2) 0.0094(14) 
F2' 0.065(2) 0.0472(15) 0.106(3) 0.016(2) -0.019(2) 0.0208(14) 
F3' 0.184(5) 0.0321(16) 0.058(2) 0.0082(13) 0.055(3) 0.050(3) 
  
_geom_special_details 
; 
 All esds (except the esd in the dihedral angle between two l.s. planes) 
 are estimated using the full covariance matrix.  The cell esds are taken 
 into account individually in the estimation of esds in distances, angles 
 and torsion angles; correlations between esds in cell parameters are only 
 used when they are defined by crystal symmetry.  An approximate (isotropic) 
 treatment of cell esds is used for estimating esds involving l.s. planes. 
; 
  
loop_ 
 _geom_bond_atom_site_label_1 
 _geom_bond_atom_site_label_2 
 _geom_bond_distance 
 _geom_bond_site_symmetry_2 
 _geom_bond_publ_flag 
S1 O2 1.4308(13) . ? 
S1 O1 1.4330(12) . ? 
S1 N2 1.6155(15) . ? 
S1 C12 1.7726(16) . ? 
N1 C4 1.318(3) . ? 
N1 C3 1.367(2) . ? 
N2 C1 1.482(2) . ? 
N2 H2 0.890(10) . ? 
C1 C2 1.509(2) . ? 
C1 H1A 0.9900 . ? 
C1 H1B 0.9900 . ? 
C2 C10 1.363(2) . ? 
C2 C3 1.425(2) . ? 
C3 C7 1.421(2) . ? 
C4 C5 1.402(3) . ? 
C4 H4 0.9500 . ? 
C5 C6 1.361(3) . ? 
C5 H5 0.9500 . ? 
C6 C7 1.415(3) . ? 
C6 H6 0.9500 . ? 
C7 C8 1.410(3) . ? 
C8 C9 1.361(3) . ? 
C8 H8 0.9500 . ? 
C9 C10 1.422(3) . ? 
C9 C11 1.507(3) . ? 
C10 H10 0.9500 . ? 
C11 H11A 0.9800 . ? 
C11 H11B 0.9800 . ? 
C11 H11C 0.9800 . ? 
C12 C17 1.388(2) . ? 
C12 C13 1.390(2) . ? 
C13 C14 1.384(2) . ? 
C13 H13 0.9500 . ? 
C14 C15 1.384(2) . ? 
C14 H14 0.9500 . ? 
C15 C16 1.386(2) . ? 
C15 C18 1.490(2) . ? 
C16 C17 1.387(2) . ? 
C16 H16 0.9500 . ? 
C17 H17 0.9500 . ? 
C18 F1 1.265(7) . ? 
C18 F2 1.269(6) . ? 
C18 F3' 1.294(4) . ? 
C18 F1' 1.319(4) . ? 
C18 F3 1.345(6) . ? 
C18 F2' 1.361(4) . ? 
  
loop_ 
 _geom_angle_atom_site_label_1 
 _geom_angle_atom_site_label_2 
 _geom_angle_atom_site_label_3 
 _geom_angle 
 _geom_angle_site_symmetry_1 
 _geom_angle_site_symmetry_3 
 _geom_angle_publ_flag 
O2 S1 O1 119.55(8) . . ? 
O2 S1 N2 107.59(8) . . ? 
O1 S1 N2 106.42(7) . . ? 
O2 S1 C12 107.68(7) . . ? 
O1 S1 C12 106.64(7) . . ? 
N2 S1 C12 108.58(8) . . ? 
C4 N1 C3 117.41(18) . . ? 
C1 N2 S1 120.39(11) . . ? 
C1 N2 H2 111.8(14) . . ? 
S1 N2 H2 112.8(14) . . ? 
N2 C1 C2 114.92(14) . . ? 
N2 C1 H1A 108.5 . . ? 
C2 C1 H1A 108.5 . . ? 
N2 C1 H1B 108.5 . . ? 
C2 C1 H1B 108.5 . . ? 
H1A C1 H1B 107.5 . . ? 
C10 C2 C3 119.01(16) . . ? 
C10 C2 C1 121.93(16) . . ? 
C3 C2 C1 119.03(16) . . ? 
N1 C3 C7 122.97(17) . . ? 
N1 C3 C2 117.88(16) . . ? 
C7 C3 C2 119.13(17) . . ? 
N1 C4 C5 124.1(2) . . ? 
N1 C4 H4 118.0 . . ? 
C5 C4 H4 118.0 . . ? 
C6 C5 C4 119.0(2) . . ? 
C6 C5 H5 120.5 . . ? 
C4 C5 H5 120.5 . . ? 
C5 C6 C7 119.9(2) . . ? 
C5 C6 H6 120.0 . . ? 
C7 C6 H6 120.0 . . ? 
C8 C7 C6 124.24(18) . . ? 
C8 C7 C3 119.12(18) . . ? 
C6 C7 C3 116.64(19) . . ? 
C9 C8 C7 121.88(17) . . ? 
C9 C8 H8 119.1 . . ? 
C7 C8 H8 119.1 . . ? 
C8 C9 C10 118.20(18) . . ? 
C8 C9 C11 122.56(18) . . ? 
C10 C9 C11 119.23(19) . . ? 
C2 C10 C9 122.62(18) . . ? 
C2 C10 H10 118.7 . . ? 
C9 C10 H10 118.7 . . ? 
C9 C11 H11A 109.5 . . ? 
C9 C11 H11B 109.5 . . ? 
H11A C11 H11B 109.5 . . ? 
C9 C11 H11C 109.5 . . ? 
H11A C11 H11C 109.5 . . ? 
H11B C11 H11C 109.5 . . ? 
C17 C12 C13 121.30(15) . . ? 
C17 C12 S1 119.17(12) . . ? 
C13 C12 S1 119.49(13) . . ? 
C14 C13 C12 119.07(16) . . ? 
C14 C13 H13 120.5 . . ? 
C12 C13 H13 120.5 . . ? 
C13 C14 C15 119.90(16) . . ? 
C13 C14 H14 120.0 . . ? 
C15 C14 H14 120.0 . . ? 
C14 C15 C16 120.89(16) . . ? 
C14 C15 C18 118.69(16) . . ? 
C16 C15 C18 120.42(17) . . ? 
C15 C16 C17 119.70(16) . . ? 
C15 C16 H16 120.1 . . ? 
C17 C16 H16 120.1 . . ? 
C16 C17 C12 119.14(16) . . ? 
C16 C17 H17 120.4 . . ? 
C12 C17 H17 120.4 . . ? 
F1 C18 F2 109.2(6) . . ? 
F1 C18 F3' 120.9(5) . . ? 
F2 C18 F3' 71.7(5) . . ? 
F1 C18 F1' 22.1(6) . . ? 
F2 C18 F1' 126.6(5) . . ? 
F3' C18 F1' 110.0(4) . . ? 
F1 C18 F3 100.1(6) . . ? 
F2 C18 F3 107.3(5) . . ? 
F3' C18 F3 36.8(4) . . ? 
F1' C18 F3 81.4(6) . . ? 
F1 C18 F2' 79.8(5) . . ? 
F2 C18 F2' 36.2(6) . . ? 
F3' C18 F2' 104.7(3) . . ? 
F1' C18 F2' 101.4(3) . . ? 
F3 C18 F2' 134.6(4) . . ? 
F1 C18 C15 117.3(5) . . ? 
F2 C18 C15 113.1(4) . . ? 
F3' C18 C15 115.2(2) . . ? 
F1' C18 C15 113.1(3) . . ? 
F3 C18 C15 108.7(4) . . ? 
F2' C18 C15 111.3(2) . . ? 
  
loop_ 
 _geom_torsion_atom_site_label_1 
 _geom_torsion_atom_site_label_2 
 _geom_torsion_atom_site_label_3 
 _geom_torsion_atom_site_label_4 
 _geom_torsion 
 _geom_torsion_site_symmetry_1 
 _geom_torsion_site_symmetry_2 
 _geom_torsion_site_symmetry_3 
 _geom_torsion_site_symmetry_4 
 _geom_torsion_publ_flag 
O2 S1 N2 C1 40.45(14) . . . . ? 
O1 S1 N2 C1 169.71(12) . . . . ? 
C12 S1 N2 C1 -75.83(14) . . . . ? 
S1 N2 C1 C2 62.65(19) . . . . ? 
N2 C1 C2 C10 -121.82(18) . . . . ? 
N2 C1 C2 C3 56.4(2) . . . . ? 
C4 N1 C3 C7 0.9(3) . . . . ? 
C4 N1 C3 C2 -177.29(17) . . . . ? 
C10 C2 C3 N1 -179.13(15) . . . . ? 
C1 C2 C3 N1 2.6(2) . . . . ? 
C10 C2 C3 C7 2.6(2) . . . . ? 
C1 C2 C3 C7 -175.69(16) . . . . ? 
C3 N1 C4 C5 -0.2(3) . . . . ? 
N1 C4 C5 C6 -0.6(4) . . . . ? 
C4 C5 C6 C7 0.7(3) . . . . ? 
C5 C6 C7 C8 179.02(19) . . . . ? 
C5 C6 C7 C3 0.0(3) . . . . ? 
N1 C3 C7 C8 -179.91(16) . . . . ? 
C2 C3 C7 C8 -1.7(3) . . . . ? 
N1 C3 C7 C6 -0.8(3) . . . . ? 
C2 C3 C7 C6 177.39(16) . . . . ? 
C6 C7 C8 C9 -179.19(19) . . . . ? 
C3 C7 C8 C9 -0.2(3) . . . . ? 
C7 C8 C9 C10 1.1(3) . . . . ? 
C7 C8 C9 C11 179.59(17) . . . . ? 
C3 C2 C10 C9 -1.7(3) . . . . ? 
C1 C2 C10 C9 176.56(16) . . . . ? 
C8 C9 C10 C2 -0.2(3) . . . . ? 
C11 C9 C10 C2 -178.72(17) . . . . ? 
O2 S1 C12 C17 172.07(13) . . . . ? 
O1 S1 C12 C17 42.60(16) . . . . ? 
N2 S1 C12 C17 -71.71(15) . . . . ? 
O2 S1 C12 C13 -10.22(15) . . . . ? 
O1 S1 C12 C13 -139.69(13) . . . . ? 
N2 S1 C12 C13 106.00(14) . . . . ? 
C17 C12 C13 C14 0.5(2) . . . . ? 
S1 C12 C13 C14 -177.19(13) . . . . ? 
C12 C13 C14 C15 -0.6(3) . . . . ? 
C13 C14 C15 C16 0.3(3) . . . . ? 
C13 C14 C15 C18 179.37(17) . . . . ? 
C14 C15 C16 C17 0.1(3) . . . . ? 
C18 C15 C16 C17 -178.92(18) . . . . ? 
C15 C16 C17 C12 -0.3(3) . . . . ? 
C13 C12 C17 C16 0.0(3) . . . . ? 
S1 C12 C17 C16 177.62(14) . . . . ? 
C14 C15 C18 F1 179.4(7) . . . . ? 
C16 C15 C18 F1 -1.5(8) . . . . ? 
C14 C15 C18 F2 -52.1(9) . . . . ? 
C16 C15 C18 F2 126.9(9) . . . . ? 
C14 C15 C18 F3' 27.7(5) . . . . ? 
C16 C15 C18 F3' -153.2(5) . . . . ? 
C14 C15 C18 F1' 155.4(4) . . . . ? 
C16 C15 C18 F1' -25.5(4) . . . . ? 
C14 C15 C18 F3 66.9(8) . . . . ? 
C16 C15 C18 F3 -114.0(8) . . . . ? 
C14 C15 C18 F2' -91.2(4) . . . . ? 
C16 C15 C18 F2' 87.8(4) . . . . ? 
  
loop_ 
 _geom_hbond_atom_site_label_D 
 _geom_hbond_atom_site_label_H 
 _geom_hbond_atom_site_label_A 
 _geom_hbond_distance_DH 
 _geom_hbond_distance_HA 
 _geom_hbond_distance_DA 
 _geom_hbond_angle_DHA 
 _geom_hbond_site_symmetry_A 
N2 H2 O1  0.890(10) 2.219(13) 3.030(2) 151.2(18) 3_665 
N2 H2 N1  0.890(10) 2.40(2) 2.900(2) 116.2(16) . 
  
_diffrn_measured_fraction_theta_max    0.994 
_diffrn_reflns_theta_full              27.92 
_diffrn_measured_fraction_theta_full   0.994 
_refine_diff_density_max    0.452 
_refine_diff_density_min   -0.428 
_refine_diff_density_rms    0.053 
